# Supplementary material
Source: PubMed Central journal article supplement (PMC7312400)
Supplement: ci0c00161_si_001.pdf [file ci0c00161_si_001.pdf]

## Supporting Information

# Scope of 3D shape-based approaches in predicting the macromolecular targets of structurally complex small molecules including natural products and macrocyclic ligands

*Ya Chen,<sup>1</sup> Neann Mathai<sup>2</sup> and Johannes Kirchmair<sup>1,2,3\*</sup>*

<sup>1</sup> Center for Bioinformatics (ZBH), Department of Computer Science, Faculty of Mathematics, Informatics and Natural Sciences, Universität Hamburg, 20146 Hamburg, Germany

<sup>2</sup> Department of Chemistry and Computational Biology Unit (CBU), University of Bergen, N-5020 Bergen, Norway

<sup>3</sup> Department of Pharmaceutical Chemistry, Faculty of Life Sciences, University of Vienna, 1090 Vienna, Austria

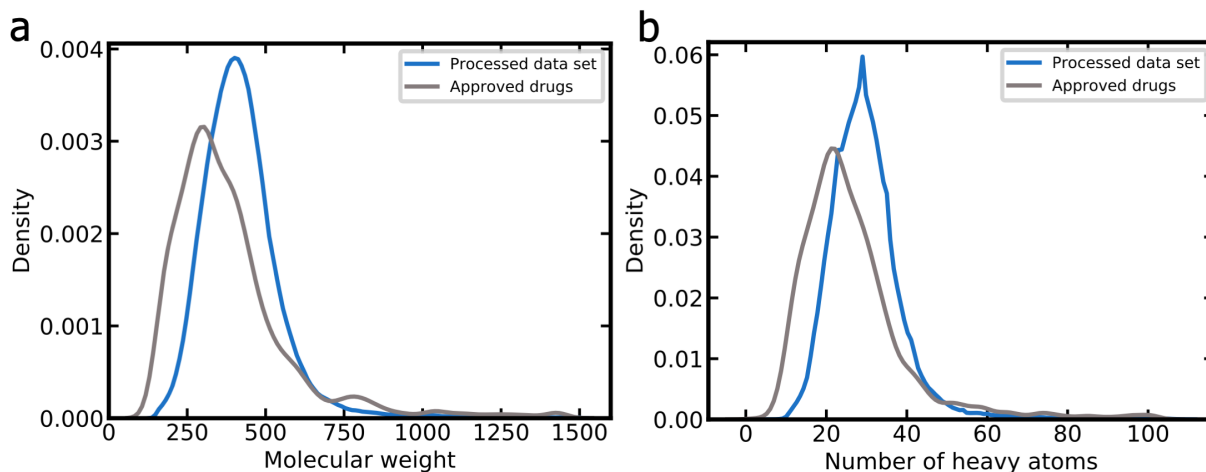

**Figure S1. Density distribution of the (a) molecular weight and (b) the number of heavy atoms of all 481 194 compounds in the processed data set (blue; these are all valid compounds with at least one annotated bioactivity). The gray lines show the respective property distributions for the "Approved Drugs" subset of DrugBank<sup>1</sup> for reference.**

## REFERENCES

- (1) Wishart, D. S.; Feunang, Y. D.; Guo, A. C.; Lo, E. J.; Marcu, A.; Grant, J. R.; Sajed, T.; Johnson, D.; Li, C.; Sayeeda, Z.; et al. DrugBank 5.0: A Major Update to the DrugBank Database for 2018. *Nucleic Acids Res.* **2018**, *46*, D1074–D1082.
